# Supplementary material for: High-resolution transcriptional dissection of in vivo Atoh1-mediated hair cell conversion in mature cochleae identifies Isl1 as a co-reprogramming factor
Source: PubMed Central journal article supplement (PMC6086484; doi:10.1371/journal.pgen.1007552), 2018-07-31

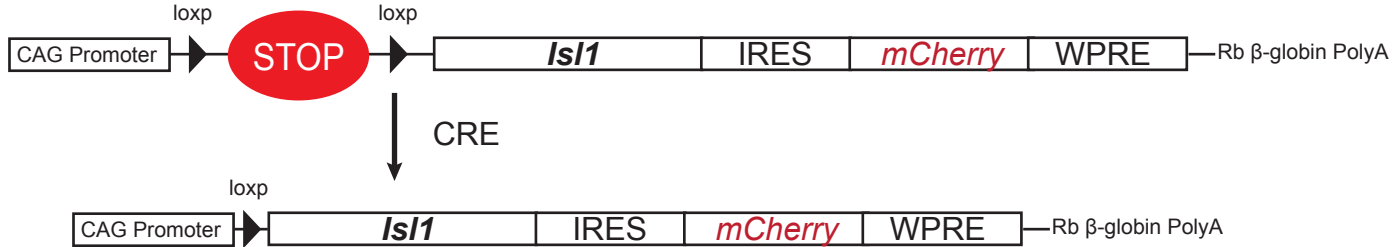

Supplement: pgen.1007552.s004.pdf [file pgen.1007552.s004.pdf]
